# Supplementary material
Source: PubMed Central journal article supplement (PMC3846258)
Supplement: NIHMS523129-supplement-1_si_001.pdf [file NIHMS523129-supplement-1_si_001.pdf]

## **SUPPORTING INFORMATION**

**The cyclin-dependent kinase inhibitor dinaciclib interacts with the acetyl-lysine recognition site of bromodomains.**

Mathew P. Martin<sup>1</sup>, Sanne H. Olesen<sup>1</sup>, Gunda I. Georg<sup>2</sup>, and Ernst Schönbrunn<sup>1\*</sup>

Supplementary Table 1. Summary of data collection and structure refinement<sup>a</sup>.

| Structure<br>(PDB ID)                                                 | (4KD1)<br>CDK2-Dinaciclib                     | (4KCX)<br>BRDT-Dinaciclib |
|-----------------------------------------------------------------------|-----------------------------------------------|---------------------------|
| <b>Data Collection</b>                                                |                                               |                           |
| <b>X-ray</b>                                                          | SER-CAT 22-ID                                 | SER-CAT 22-ID             |
| <b>Wavelength (Å)</b>                                                 | 1.0                                           | 1.0                       |
| <b>Space group</b>                                                    | P2 <sub>1</sub> 2 <sub>1</sub> 2 <sub>1</sub> | P2 <sub>1</sub>           |
| <b>Unit cell dimensions (Å)</b>                                       | a=53.69                                       | a=64.72                   |
|                                                                       | b=71.89                                       | b=29.95                   |
|                                                                       | c=72.40                                       | c=71.38                   |
|                                                                       |                                               | β=94.12                   |
| <b>Resolution range</b>                                               | 20-1.7<br>(1.8-1.7)                           | 20-2.0<br>(2.1-2.0)       |
| <b>Unique reflections</b>                                             | 31460<br>(4879)                               | 18535<br>(2488)           |
| <b>Completeness (%)</b>                                               | 99.9 (100)                                    | 97.8 (98.1)               |
| <b>I/σ</b>                                                            | 24.9 (4.8)                                    | 7.7 (3.3)                 |
| <b>R<sub>sym</sub><sup>a</sup> (%)</b>                                | 4.8 (37.9)                                    | 12.7 (62.4)               |
| <b>Structure refinement</b>                                           |                                               |                           |
| <b>Protein atoms</b>                                                  | 2398                                          | 1780 (dimer)              |
| <b>Average B-factor (Å<sup>2</sup>)</b>                               | 25                                            | 42                        |
| <b>Ligand atoms</b>                                                   | 29                                            | 58                        |
| <b>Average B-factor (Å<sup>2</sup>)</b>                               | 20                                            | 28                        |
| <b>Solvent molecules</b>                                              | 216                                           | 137                       |
| <b>Average B-factor (Å<sup>2</sup>)</b>                               | 29                                            | 41                        |
| <b>other atoms</b>                                                    | 4                                             | 1                         |
| <b>Average B-factor (Å<sup>2</sup>)</b>                               | 34                                            | 20                        |
| <b>r.m.s.d.<sup>b</sup> bonds (Å)</b>                                 | 0.016                                         | 0.008                     |
| <b>r.m.s.d. angles (°)</b>                                            | 1.2                                           | 1.2                       |
| <b>R<sub>cryst</sub><sup>c</sup> (%)</b>                              | 19.4                                          | 21.1                      |
| <b>R<sub>free</sub><sup>d</sup> (%)</b>                               | 23.2                                          | 25.3                      |
| <b>R<sub>free</sub> reflection set size</b>                           | 1007 (3.2 %)                                  | 927 (5.0 %)               |
| <b>Coordinate error (Å)</b><br><small>(ML method from PHENIX)</small> | 0.23                                          | 0.23                      |

<sup>a</sup> R<sub>sym</sub> = SUM ( ABS(I - <I>) ) / SUM (I)  
<sup>b</sup> r.m.s.d. = root mean square deviation from ideal values.  
<sup>c</sup> R<sub>cryst</sub> = 100 x Σ | F<sub>obs</sub> - F<sub>model</sub> | / F<sub>obs</sub> where F<sub>obs</sub> and F<sub>model</sub> are observed and calculated structure factor amplitudes, respectively.  
<sup>d</sup> R<sub>free</sub> is R<sub>cryst</sub> calculated for randomly chosen unique reflections, which were excluded from the refinement.

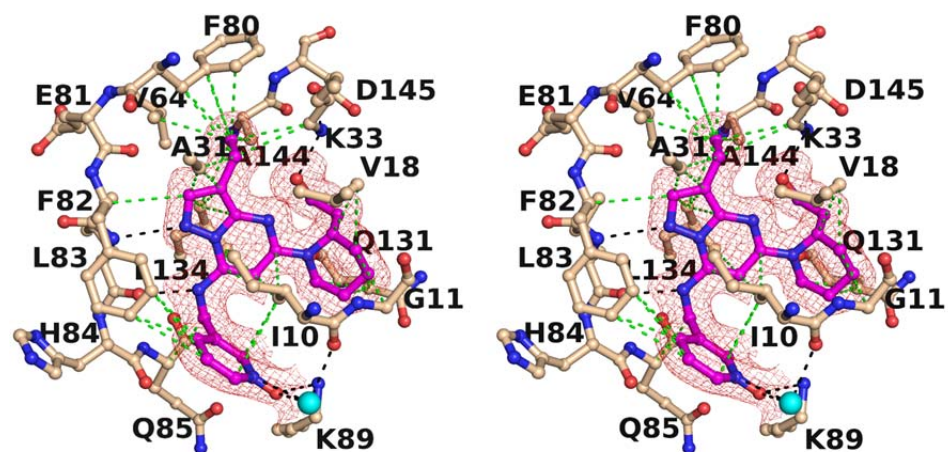

**Supplementary Figure 1.** Crystal structure of dinaciclib bound to CDK2 (Stereo presentations of the binding interactions). The  $F_o-F_c$  electron density map of the omitted inhibitor is contoured at  $2.5 \sigma$  and shown as red mesh. Potential hydrogen bonding and van der Waals interactions are indicated as black and green dotted lines, respectively.

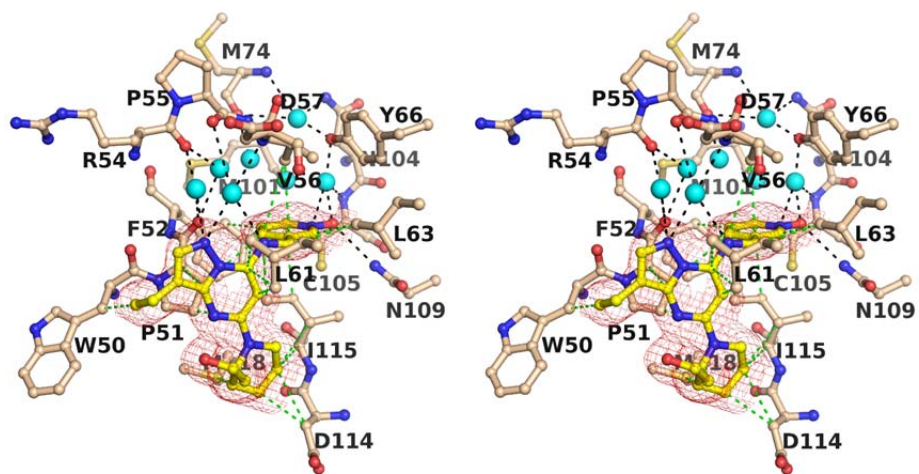

**Supplementary Figure 2.** Crystal structure of dinaciclib bound to BRDT (Stereo presentations of the binding interactions). The Fo-Fc electron density map of the omitted inhibitor is contoured at  $2.5 \sigma$  and shown as red mesh. Potential hydrogen bonding and van der Waals interactions are indicated as black and green dotted lines, respectively.

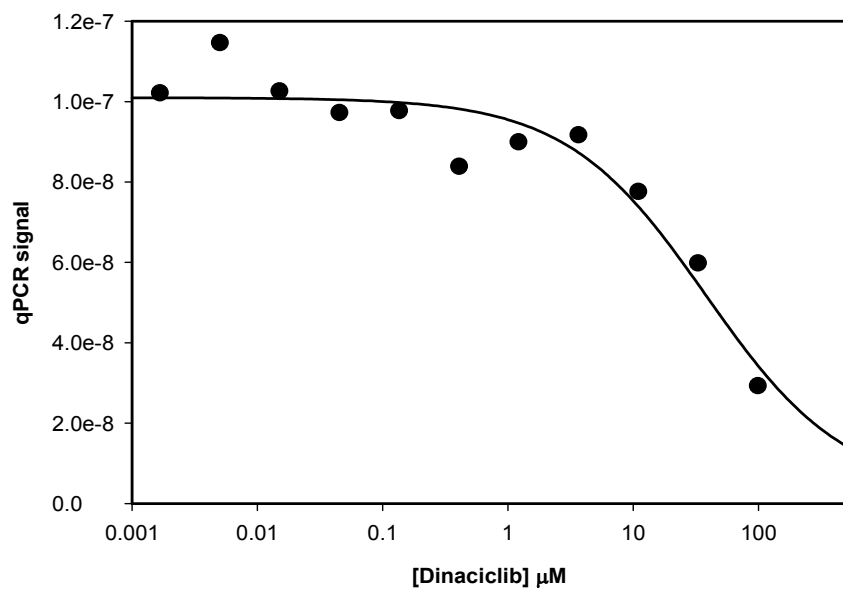

**Supplementary Figure 3.  $K_d$  determination of dinaciclib interaction with BRDT (performed by DiscoverX Corp.).**
